## Single-cell transcriptomic analysis of CA1 inhibitory neurons

Kenneth D. Harris<sup>1,2</sup>, Carolina Bengtsson Gonzales<sup>3</sup>, Hannah Hochgerner<sup>3</sup>, Nathan G. Skene<sup>3</sup>, Lorenza Magno<sup>4</sup>, Linda Katona<sup>5</sup>, Peter Somogyi<sup>5</sup>, Nicoletta Kessaris<sup>4</sup>, Sten Linnarsson<sup>3</sup>, Jens Hjerling-Leffler<sup>3</sup>

1 – UCL Institute of Neurology, Queen Square, London WC1N 3BG, UK

2 – UCL Department of Neuroscience, Physiology and Pharmacology, 21 University Street, London WC1E 6DE, UK

3 - Division of Molecular Neurobiology, Department of Medical Biochemistry and Biophysics, Karolinska Institutet, S-171 77 Stockholm, Sweden

4 – Wolfson Institute for Biomedical Research, University College London, Gower Street, London WC1E 6BT, UK

5 – Department of Pharmacology, University of Oxford, Mansfield Road, Oxford OX1 3TH, UK

Single-cell transcriptomics provides a powerful tool to understand cell classes in neural circuits. In cortex, however, the identification of distinct biological cell types based on transcriptomic data is complicated by the existence of many incompletely-understood and closely-related neural classes, which can also show continuous variation in gene expression. The inhibitory cells of hippocampal area CA1 have been extensively characterized, leading to 23 currently defined cell types that provide a “Rosetta Stone” for transcriptomic analysis. Here, we studied the transcriptomes of 3638 CA1 inhibitory cells. Novel clustering methods identified all 23 previously described CA1 inhibitory types, while also suggesting 6 new inhibitory classes. Latent-factor analysis revealed a common continuum of expression of many genes within and between classes, which we hypothesized correlates with a continuum from faster-spiking cells that proximally target pyramidal cells, to slower active cells targeting pyramidal distal dendrites or interneurons. *In vitro* patch-seq of *Pvalb* interneurons supported hypothesis.

### Introduction

Understanding of the cell types comprising neural circuits is critical for an understanding their function. Single-cell RNA sequencing (scRNA-seq) provides a powerful opportunity for categorizing these types, as major cell classes can have substantially different patterns of gene expression (Habib et al., 2016; Macosko et al., 2015; Tasic et al., 2016; Usoskin et al., 2015; Zeisel et al., 2015). Nevertheless, relating gene expression patterns to underlying cell types is not always straightforward. This is particularly true in circuits such as the cortex, where many closely-related excitatory and inhibitory cell types exist. Indeed, while transcriptomics can divide cells into clusters with similar gene expression profiles, identifying them with known cell types will require connecting these molecular classes to morphological and functional categories.

The hippocampus provides a promising opportunity to relate transcriptomic analyses to cortical cell types. The hippocampus has a simpler architecture than isocortex, and intensive work over the last 30 years has built up a relatively complete picture of hippocampal inhibitory cells types, relating their morphological characteristics, connectivity, physiology and *in vivo* firing patterns to several tens of molecular markers (Freund and Buzsaki, 1996; Klausberger and Somogyi, 2008). This analysis has been most fully completed in area CA1, where 23 distinct inhibitory types have been defined so far (Somogyi, 2010).

Identification of transcriptomic clusters with cell types is complicated by the fact that cells can show continuous variation in gene expression. Previous work has shown apparently continuous variation within single cell types, as well as fuzzy boundaries between clusters corresponding to putative single classes (Marques et al., 2016; Tasic et al., 2016; Zeisel et al., 2015). Continuous variation in gene expression could reflect continuous variation of cellular properties, such as laminar location, physiology, or connectivity profiles. Furthermore, gene expression levels in interneurons are dynamically regulated, for example by activity or by learning (Cohen et al., 2016; Dehorter et al., 2015; Donato et al., 2013; Mardinly et al., 2016; Spiegel et al., 2014). Understanding how such continua might relate to both fixed features such as axonal and dendritic connectivity and to activity will be easier in systems such as CA1, whose cell types have been extensively characterized by previous work.

Here we describe a transcriptomic analysis of 3638 inhibitory neurons from mouse hippocampal area CA1, revealing 49 clusters out of which we could identify 43 as previously described cell types. All 23 previously described CA1 GABAergic classes could be identified in our database, with the larger number of clusters reflecting six hypothesized novel cell types, several previously unappreciated subtypes of existing types, and tiling of continuous gradation within single types by multiple clusters. A common continuous pattern of gradation between and within classes appeared to reflect a continuum from fast-firing cells targeting principal cell

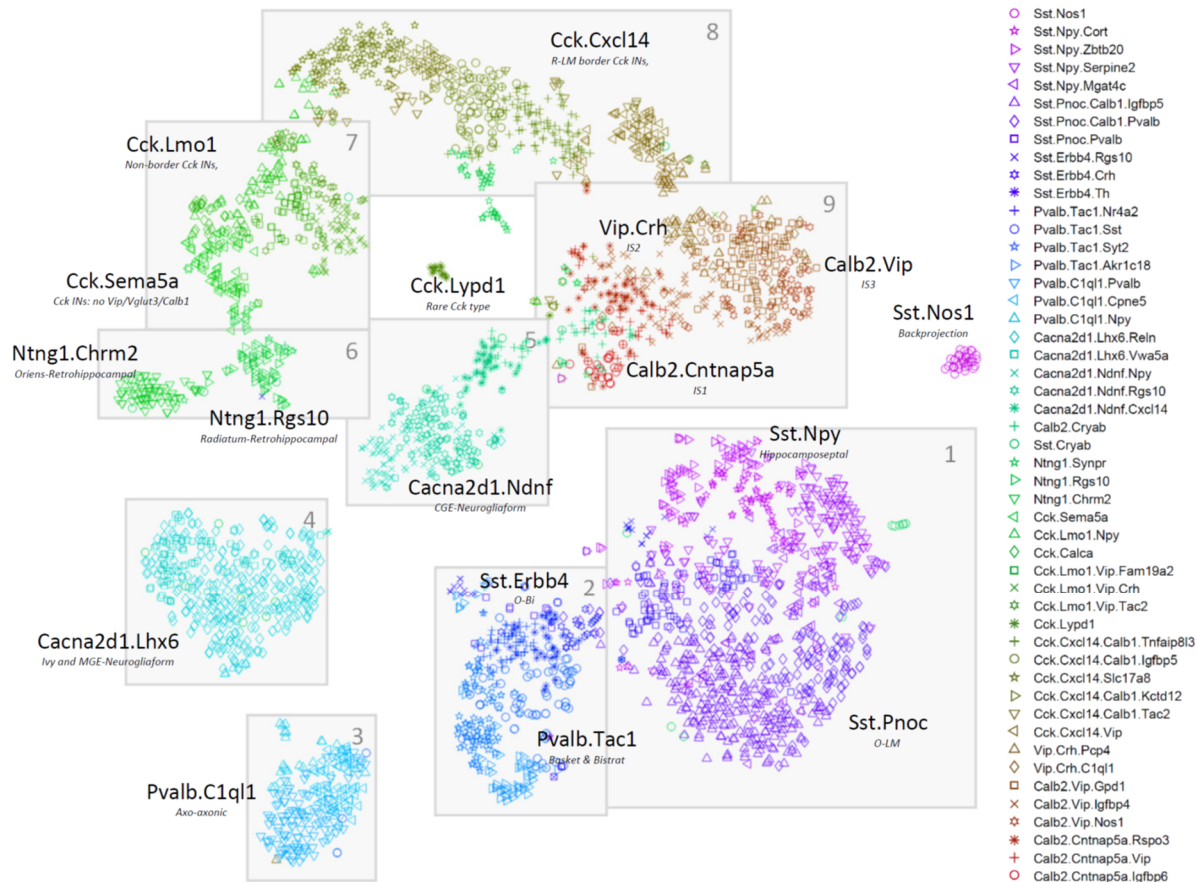

**Figure 1.** Two-dimensional visualization of expression patterns using nbtSNE algorithm, which places cells closely together according to a negative binomial criterion. Each symbol represents a cell, with different color/glyph combinations representing different cell classes (legend, right). Grey boxes and numbers refer to the “continents” referred to in the text and subsequent figures.

somata and proximal dendrites, to slower-firing cells targeting distal dendrites or interneurons. Patch-seq recordings of hippocampal *Pvalb* interneurons confirmed that this genetic latent factor correlates with the strength of a neuron’s fast-spiking phenotype.

## Results

### Data collection and identification of inhibitory cells

We collected cells from six *Slc32a1-Cre;R26R-tdTomato* mice, three of age p60 and three of age p27. Cells were procured using enzymatic digestion and manual dissociation of CA1 tissue after dissection as previously described (Zeisel 2015). The great majority of cells (4572/6971 cells total; 3283/3638 high-quality interneurons) came from the older animals. Because we observed no major difference in interneuron classes between ages, data was pooled between them (Figure S1). FACS sorting yielded an enriched, but not completely

pure population of GABAergic neurons. A first-round clustering (using the method described below) was therefore run on the 5940 cells passing quality control, identifying 3638 inhibitory and 357 excitatory neurons (as judged by the expression of genes *Gad1/Slc32a1* and *Vglut1* respectively) as well as 1779 non-neuronal, and 166 unclassified cells.

### Cluster analysis

We analyzed the data using a suite of three algorithms, derived from a probabilistic model of RNA distributions. All three methods were based on the observation that RNA counts within a homogeneous population can be approximated using a negative binomial distribution (See Experimental Procedures; Lu et al., 2005; Robinson and Smyth, 2008). The negative binomial distribution accurately models the high variance of transcriptomic read counts (Figure S2A,B). As a consequence, algorithms based on this distribution weight the presence or absence of a gene more than its numerical expression

## CA1 inhibitory neurons

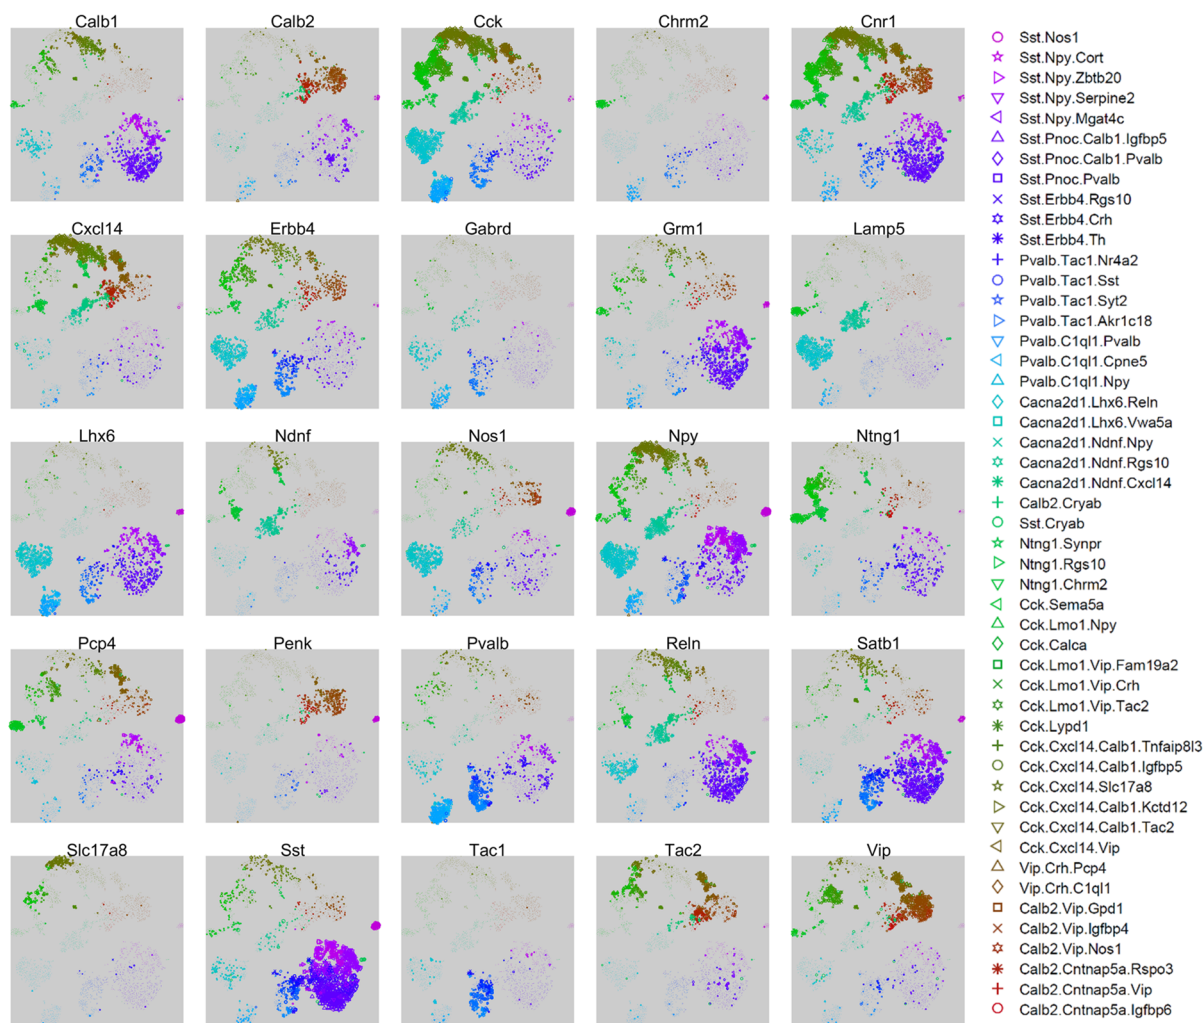

**Figure 2.** Expression levels of 25 selected genes, that together allow identification of major cell classes. Each subplot shows an nbtSNE map of all cells, with marker size indicating log-expression level of the gene named above the plot.

level – for example, this distribution treats read counts of 0 and 10 as more dissimilar than read counts of 500 and 1000 (Figure S2C).

The algorithm we used for clustering was termed ProMMT (Probabilistic Mixture Modeling for Transcriptomics). This algorithm fits gene expression in each cluster  $k$  by a multivariate negative binomial distribution with cluster-specific mean  $\mu_k$ . The mean expression levels of only a small subset of genes are allowed to vary between clusters (150 for the current analysis); these genes are selected automatically by the algorithm by maximum likelihood methods. The use of such “sparse” methods is essential for probabilistic classification of high dimensional data (Bouveyron and Brunet-Saumard, 2014), and the genes selected represent those most informative for cluster differentiation. The

number of clusters was chosen automatically using the Bayesian Information Criterion (BIC) (Schwarz, 1978). The ProMMT algorithm also provides a natural measure of the distinctness of each cluster, which we term the *isolation metric* (see Experimental Procedures).

The ProMMT algorithm divided CA1 interneurons into 49 clusters (Figure S3). We named the clusters using a multilevel scheme, after genes that are strongly expressed at different hierarchical levels; for example, the cluster *Calb2.Vip.Nos1* belongs to a first level group characterized by strong expression of *Calb2* (indicating interneuron selective interneurons); a second level group *Calb2.Vip*; and a third level group distinguished from other *Calb2.Vip* cells by stronger expression of *Nos1*. This naming scheme was based on the results of hierarchical cluster analysis of cluster means, using a distance metric

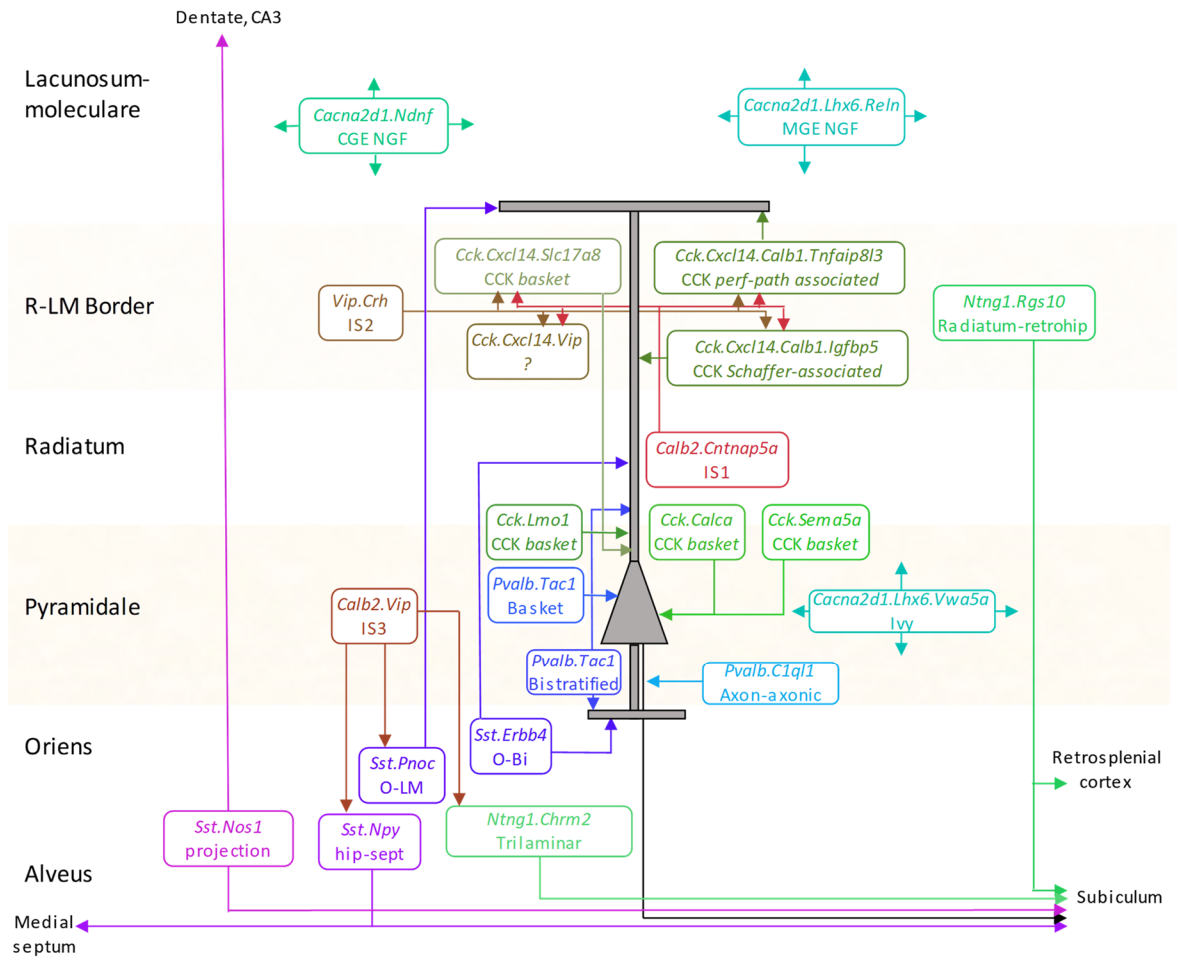

**Figure 3:** Inferred circuit diagram of identified GABAergic cell types. The identification of transcriptomic clusters with known cell classes is described in the supplementary material. Laminar locations and connections between each class are derived from previous literature.

based on the negative binomial model (Experimental Procedures; **Figure S4**).

### Data Visualization

To visualize cell classes in two dimensions, we modified the t-stochastic neighbor embedding algorithm (Maaten and Hinton, 2008) for data with negative binomial variability, terming this approach nbtSNE. In conventional tSNE, the similarity between data points is defined by their Euclidean distance, which corresponds to conditional probabilities under a Gaussian distribution. We obtained greater separation of clusters and a closer correspondence to known cell types, by replacing the Gaussian distribution with the same negative binomial distribution used in our clustering algorithm (see Experimental Procedures; **Figure S5**).

The nbtSNE maps revealed that cells were arranged in 9 major “continents” (**Figure 1**). The way expression of a single gene differed between classes could be

conveniently visualized on these maps by adjusting the symbol size for each cell according to that gene’s expression level. Thanks to the extensive literature on CA1 interneurons, 25 genes together sufficed to identify the main continents with known cell classes (**Figure 2**), and it was also possible to identify nearly all the finer subclasses using additional genes specific to each class.

### Identification of cell types

Explaining how we identified these transcriptomic clusters with known cell types requires an extensive discussion of the previous literature, which is presented in full in the Supplementary Material. Here, we briefly summarize the major subtypes identified (summarized in **Figure 3**).

Continent 1 was identified with the *Sst* positive hippocampal and O-LM cells of *stratum oriens* (*so*). These cells all expressed *Sst* and *Grm1*, and were further divided into two *Npy*+/*Ngf*+ clusters identified as



hippocamposeptal neurons (Acsády et al., 2000), and three *Pnoc+/Reln+/Npy-* clusters identified with O-LM cells (Katona et al., 2014). A highly distinct cluster located in an “island” off this continent contained cells strongly positive for *Sst* and *Nos1* (Jinno and Kosaka, 2004), whose expression pattern matches those of both backprojection cells (Sik et al., 1994) and PENK-positive projection cells (Fuentealba et al., 2008a), suggesting that these may reflect a single cell type. In addition, Continent 1 contains a previously undescribed subclass positive for *Sst*, *Npy*, and *Reln*.

Continent 2 was identified as basket and bistratified cells. These were all positive for *Tac1* (the precursor to the neuropeptide Substance P), as well as *Satb1* and *ErbB4*, but were negative for *Grm1*. They were divided into two *Pvalb+/Sst-* clusters identified with basket cells, two *Pvalb+/Sst+/Npy+* clusters identified with bistratified cells (Klausberger et al., 2004), and three *Pvalb-* clusters identified with Oriens-Bistratified (o-Bi) cells (Losonczy et al., 2002).

Continent 3 was identified as axo-axonic cells, due to their expression of *Pvalb* but not *Satb1* (Viney et al., 2013) This continent’s three clusters were *Tac1*-negative but positive for other markers including *Snca*, *Pthlh* and *C1ql1*, which have also been associated with axo-axonic cells in isocortex (Tasic et al., 2016). We note that this dichotomy of *Pvalb* interneurons into *Tac1* positive and negative subclasses is likely homologous to previous observations in isocortex (Vruwink et al., 2001).

Continent 4 was identified as Ivy cells and MGE-derived neurogliaform cells. These cells expressed *Cacna2d1*, which we propose as a unique identifier of hippocampal neurogliaform/ivy cells, as well as *Lhx6* and *Nos1* (Tricoire et al., 2010). They were divided into a *Reln+* cluster identified with MGE-derived neurogliaform cells, and a *Reln-/Vwa5a+* cluster identified with Ivy cells (Fuentealba et al., 2008b). This continent is homologous to the isocortical *Igtp* class defined by Tasic et al (2016), which we hypothesize may represent isocortical neurogliaform cells of MGE origin; this hypothesis could be confirmed using fate-mapping.

Continent 5 was identified as CGE-derived neurogliaform cells. Its three clusters contained *Cacna2d1* and many other genes in common with those of continent 4, but lacked *Lhx6* and *Nos1* (Tricoire et al., 2010). Similar to isocortical putative neurogliaform cells, this continent expressed *Ndnf* and contained a distinct subtype positive for *Cxcl14* (Tasic et al., 2016). As with continent 4, continent 5 mainly expressed *Reln* but also contained a

small *Reln*-negative cluster, which we suggest forms a rare and novel class of CGE-derived ivy cell.

Continent 6 was identified with *Sst*-negative long-range projection interneurons. It divided into two distinct clusters, both of which were strongly positive for *Ntng1*. The first strongly expressed *Chrm2* but lacked *Sst* and *Pvalb*, identifying them as trilaminar cells (Jinno et al., 2007). The second subgroup lacked most classical molecular markers; this fact, together with their inferred laminar location at the *sr/slm* border, identified them as putative radiatum-retrohippocampal neurons that project to retrosplenial cortex (Jinno et al., 2007; Miyashita and Rockland, 2007).

Continents 7 and 8 were identified as what are traditionally called *Cck* interneurons. This term is somewhat unfortunate: while these cells indeed strongly express *Cck*, many other inhibitory classes express *Cck* at lower levels, including even *Pvalb+* basket cells (Tricoire et al., 2011). Continents 7 and 8 cells comprised thirteen highly diverse clusters, but shared strong expression of *Cnr1*, *Sncg*, *Trp53i11* and several other novel genes. Continent 8 is distinguished by expression of *Cxcl14*, which localizes these cells to the border of *stratum radiatum* and *stratum lacunosum-moleculare* (*sr/slm*). This continent comprised a continuum ranging from soma-targeting basket cells identified by their *Slc17a8* (vGlut3) expression, to dendrite targeting cells identified by expression of *Calb1* or *Reln* (Klausberger et al., 2005; Somogyi et al., 2004). Continent 7, lacking *Cxcl14*, was identified as *Cck* cells of other layers, and contained multiple subtypes characterized by the familiar markers *Calb1*, *Vip*, *Slc17a8* (Somogyi et al., 2004), as well novel markers such as *Sema5a* and *Calca*. Associated with continent 8 were several apparently novel subtypes: a rare and distinct group positive for both *Scl17a8* and *Calb1* and marked nearly exclusively by *Lypd1*; a *Ntng1+/Ndnf+* subgroup related to cells of continent 6; and a group strongly expressing both *Vip* and *Cxcl14*, which therefore likely corresponds to a novel *Vip+/Cck+* interneuron at the *sr/slm* border.

Continent 9 was identified as interneuron-selective interneurons. Its eight clusters fell into three groups: *Calb2+/Vip-* neurons identified as IS-1 cells; *Calb2-/Vip-* neurons identified as IS-2 cells; and *Calb2+/Vip+* neurons identified as IS-3 cells (Acsády et al., 1996; Freund and Buzsáki, 1996; Gulyás et al., 1996; Tyan et al., 2014). All expressed *Penk* (Blasco-Ibanez et al., 1998). These cells contained at least two novel subgroups: an IS-3 subtype positive for *Nos1* and *Myll1*, homologous to the *Vip Mybpc2* class defined in isocortex (Tasic et al., 2016); and a rare subclass of IS-1 cell positive for *Igfbp6*.

### Continuous variation between and within cell classes

Although the major continents of the expression map were clearly separated, clusters within these continents often appeared to blend into each other continuously. This indicates continuous gradation in gene expression patterns: while our probabilistic mixture model will group cells from a common negative binomial distribution into a single cluster, it will tile cells of continuously graded mean expression into multiple clusters.

These continua reflect both positive and negative correlations between genes. For example, in *Pvalb*-positive putative basket and bistratified cells, multiple genes associated with fast-spiking phenotype (such as *Kcnc1*, *Kcna1*, and *Pvalb*) were positively correlated with expression of the Na<sup>+</sup>/K<sup>+</sup> pump *Atp1b1*, but negatively correlated with expression the ATP1B1 modulator *Fxyd6* (mutations in which have been associated with schizophrenia; Choudhury et al., 2007). This correlated variability was evident both between subtypes of *Pvalb* neurons, and between different individual cells within *Pvalb* classes (Figure 4A). We conclude that *Pvalb*-positive interneurons exhibit continuous correlated variation in the expression of multiple genes; that the mean expression in different *Pvalb* subclasses lies at different locations along this continuum; but that variability also exists within the cells of a single subclass.

Patterns of correlated variability were similar across multiple interneuronal classes, in a manner consistent with their known spiking phenotypes (Figure 4A,B). For example, most CCK interneurons show a regular-spiking phenotype, but a minority of fast-spiking CCK interneurons have also been reported (Cope et al., 2002; Pawelzik et al., 2002). Consistent with this, we found that expression of fast-spiking associated genes such as *Kcnc1* was on average lower in clusters corresponding to *Cck* interneurons, but that some cells still expressed these genes. Expression of *Kcnc1* showed similar correlations with *Atp1b1* and *Fxyd6* within *Cck* interneurons as within *Pvalb*-positive neurons (Figure 4B). We suggest that the preserved correlations between these example genes reflect common phenotypic modulation between these cells, specifically reflecting altered ion exchange requirements in faster-spiking cells.

In addition to these commonalities, however, there were differences in the correlated variability across cell types. These mostly reflected differences in which genes are expressed by which classes. For example, because *Pvalb* is not expressed in *Cck* interneurons, it cannot exhibit a correlation; conversely, other genes expressed in *Cck* but

not *Pvalb* interneurons (such as the cannabinoid receptor *Cnr1*) showed similar patterns of correlation with other genes (Figure 4B). Nevertheless, the patterns of correlation in continent 9 (identified with I-S cells) were largely unrelated to those of previous cell groups, even when the same genes were expressed. For example, *Fxyd6* and *Atp1b1* were positively correlated in this group (not shown).

To characterize this common mode of continuous variability across cell classes beyond these examples, we developed a probabilistic latent factor model (Experimental Procedures). In this model, gene expression vectors follow a negative binomial distribution whose mean depends on a single latent factor (i.e. a hidden variable), with a gene-specific weight. We applied this latent factor model to the entire dataset, and studied the weighting of genes with known function to infer the biological significance of the continuum (Figure 4C). Genes associated with fast-spiking phenotype (e.g. *Kcnc1*, *Kcna1*, *Pvalb*) had positive weights, as did mitochondrial genes; genes associated with ion exchange and metabolism (e.g. *Atp1b1*; *Slc24a2*); genes associated with GABA synthesis, transport, and vesicular release (e.g. *Gad1*, *Slc6a1*, *Syp*, *Sv2a*, *Cplx2*, *Vamp1*); and genes associated with fast ionotropic glutamate and GABA receptors (e.g. *Gria1*, *Gabra1*), as well as GABA<sub>B</sub> receptors (e.g. *Gabbr1*, *Gabbr2*, *Kcnj3*, *Kctd12*). The genes correlating negatively with the latent factor were less familiar, but included *Atp1b2*, a second isoform of the Na<sup>+</sup>/K<sup>+</sup> pump; *Fxyd6*, which modulates its activity; *Nrsn1*, whose translation is suppressed after learning (Cho et al., 2015), as well as most neuropeptides (e.g. *Sst*, *Vip*, *Cartpt*, *Tac2*, *Penk*, *Crh*; exceptional neuropeptides such as *Cck* showed positive correlation). Genes associated with neurofilaments and intermediate filaments (e.g. *Nefh*, *Nefl*, *Krt73*) tended to show positive weights, while genes associated with actin processing (e.g. *Gap43*, *Stmn1*, *Tmsb10*) tended to show negative weights. Many other genes of as yet unknown function correlated positively and negatively with this latent factor (for example *6330403K07Rik*, which showed strong negative correlations).

We therefore hypothesize that cells with large values of the latent factor have a fast-spiking firing pattern; possess more synaptic vesicles and release larger amounts of GABA; receive stronger excitatory and inhibitory inputs; and exhibit faster metabolism. These are all characteristics of *Pvalb*-expressing fast-spiking interneurons (Hu et al., 2014), but a similar continuum was observed also within *Pvalb*-negative neurons.

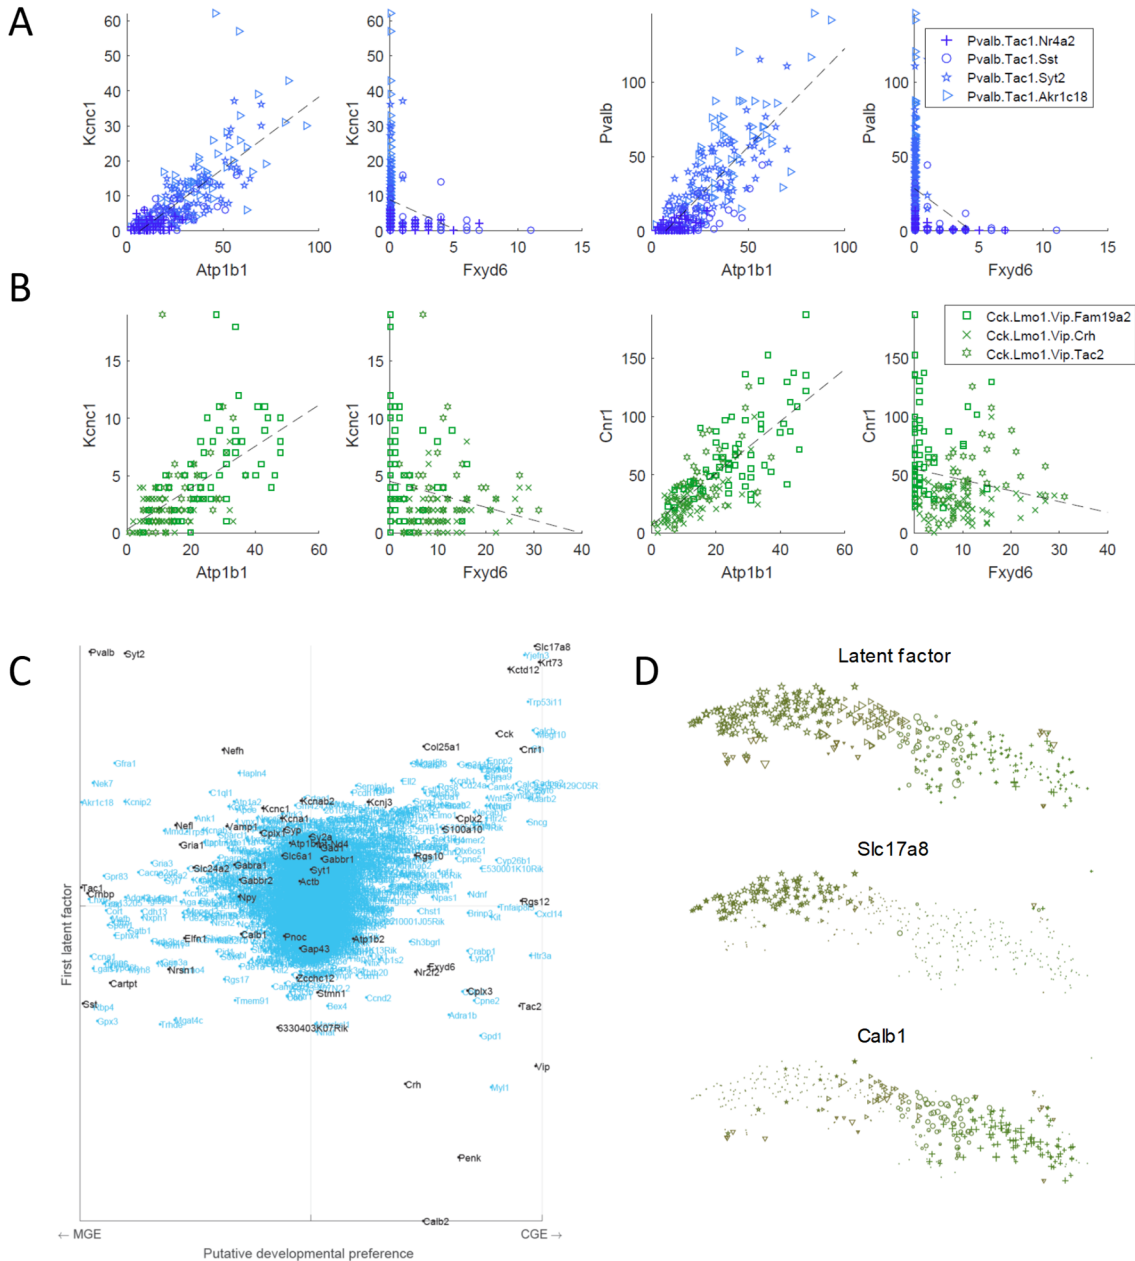

**Figure 4.** Continuous variation of expression between and within cell classes. **A**, In *Pvalb*-positive neurons, genes associated with fast-spiking phenotype (e.g. *Kcnc1* and *Pvalb*) are positively correlated with the  $\text{Na}^+/\text{K}^+$  pump *Atp1b1* but negatively correlated with its modulator *Fxyd6*. **B**, In *Cck/Vip*-positive neurons, expression of *Kcnc1* is lower than in *Pvalb* neurons, but correlations with *Atp1b1* and *Fxyd6* persist. *Pvalb* is not expressed in these neurons, but a similar correlation is observed for *Cnr1*. **C**, Latent factor analysis reveals a common mode of variation across cell types. Y-axis shows weighting of each gene onto the latent factor; x-axis shows relative expression of gene in MGE- and CGE-derived cell classes. Genes associated with fast-spiking phenotype, GABA synthesis, metabolism, excitatory and inhibitory inputs, and vesicle release are positively weighted on the latent factor. Black text highlights selected genes of particular interest. **D**, In *Cck* interneurons, the latent factor correlates with what part of pyramidal cells they target. Top: zoom of nbtSNE map for region of continent 8 identified with *Cck* interneurons at the *sr/slm* border, with symbol size representing value of hidden factor. Middle: symbol size represents expression of *Slc17a8*, a marker of soma-targeting *Cck* cells. Bottom: symbol size represents expression of *Calb1*, a marker of dendrite-targeting *Cck* cells.

The latent factor also differed between cells inhibiting the soma and dendrites of pyramidal cells. For example, consider the *Cck.Cxcl14* cells of continent 8 (**Figure 4D**), identified with *Cck*-positive neurons at the *sr/slm* border.

Immunohistochemistry has demonstrated that in these cells, gene expression correlates with axon target: SLC17A8-positive basket cells project to the pyramidal layer (Somogyi et al., 2004), while CALB1 is expressed in

neurons targeting pyramidal cell dendrites (Cope et al., 2002; Gulyás and Freund, 1996; Klausberger and Somogyi, 2008). Furthermore, *in vitro* recordings indicate that *Cck* interneurons targeting pyramidal somata have a faster-spiking phenotype: lower input resistance, narrower spikes, and less adaptation than those targeting pyramidal dendrites (Cope et al., 2002). The latent factor was higher in soma-targeting neurons: it was high to the west of continent 8, where *Slc17a8* is expressed, but lower in the east where *Calb1* is expressed (Figure 4D). Consistent with this result, the cannabinoid receptor *Cnr1*, which is more strongly expressed in soma-targeting neurons (Dudok et al., 2015; Lee et al., 2010) was more strongly expressed in the west. This therefore indicates a gradation from faster-spiking soma-targeting cells in the west of continent 8, to more regular-spiking dendrite-targeting cells in the east. Similar behavior was seen for many other cell classes. For example, *Sst.Pnoc* cells, identified with distal-targeting O-LM cells had lower latent factor values than *Pvalb.Tac1* cells identified with proximal-targeting basket and bistratified cells. The smallest latent factor values belonged to the *Calb2* cluster, identified with interneuron-specific interneurons.

In summary, we suggest that most interneuron classes exhibit a common continuum of gene expression patterns, that ranges from expression patterns typical of soma-targeting neurons that fire faster, synthesize and release more GABA, to slower-firing dendrite-targeting or interneuron-specific neurons whose action might rely more heavily on neuropeptides. Similar variability was seen within cells of a single type, with the exception of interneuron-selective cells, whose patterns of continuous variation differ to those of other classes.

### Patch-seq analysis confirms that genetic continuum correlates with fast-spiking phenotype

To test the hypothesis that the latent factor correlates with a neuron's electrophysiological firing pattern, we turned to Patch-seq analysis (Cadwell et al., 2016; Fuzik et al., 2016). We recorded from 25 hippocampal interneurons of area CA1 of *Pvalb-Cre;R26R-TdTomato* mice using *in vitro* whole-cell patch-clamp, and measured a set of standard parameters using square current steps. Principal component analysis of these parameters (Figure 5A) revealed a dominant mode of variability (PC1) corresponding to variations in the strength of fast-spiking phenotype, characterized by narrow spikes, fast membrane timeconstant, low adaptation and rheobase, and rapid firing, sometimes with delayed onset (Hu et al., 2014). We sequenced mRNA from the patch pipette using previously described methods (Fuzik et al., 2016) setting

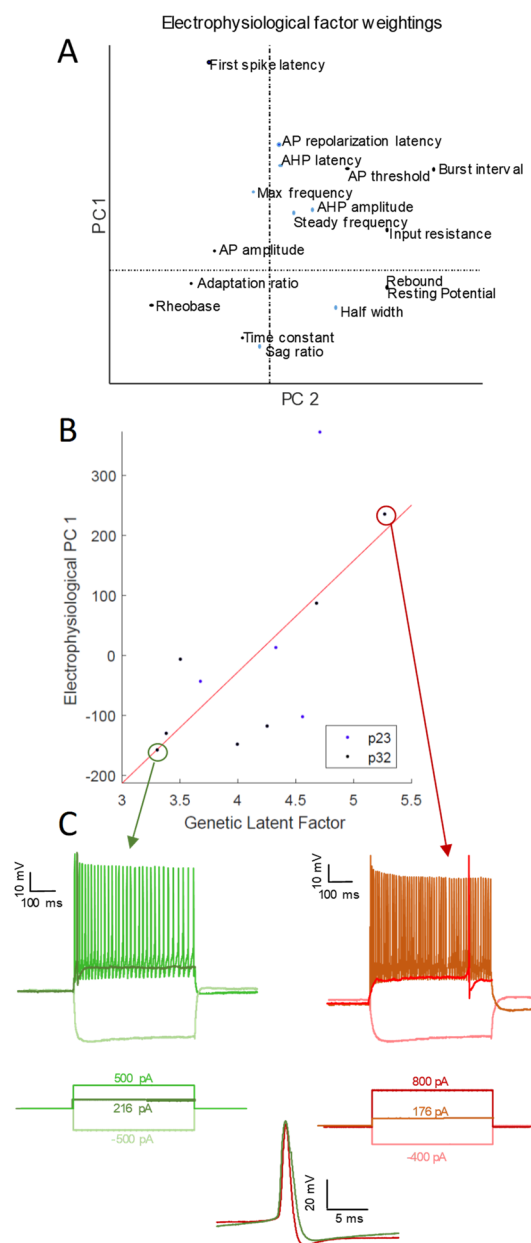

Figure 5. Genetic latent factor correlates with fast-spiking phenotype. **A**, Principal component analysis was applied to electrophysiological characteristics of *Pvalb* interneurons recorded intracellularly *in vitro*. Examination of factor weightings across cells indicated that cells with higher values of PC1 exhibited a fast-spiking phenotype: narrower spikes, higher peak firing rates, and at times delayed-spiking. **B**, RNA extracted from the patch pipette was sequenced and used to compute the latent factor defined in figure 4C for each cell, using weights defined from the full database. The genetic latent factor was positively correlated with the fast-spiking phenotype measured by PC1. Colors indicate donor mouse age. **C**, Example traces of two recorded neurons. Note the lesser adaptation and delayed-spiking phenotype of the cell with higher latent factor. Bottom: close-up of superimposed spike waveforms for these two cells; note the narrower spike waveform of the cell of high latent factor (red).



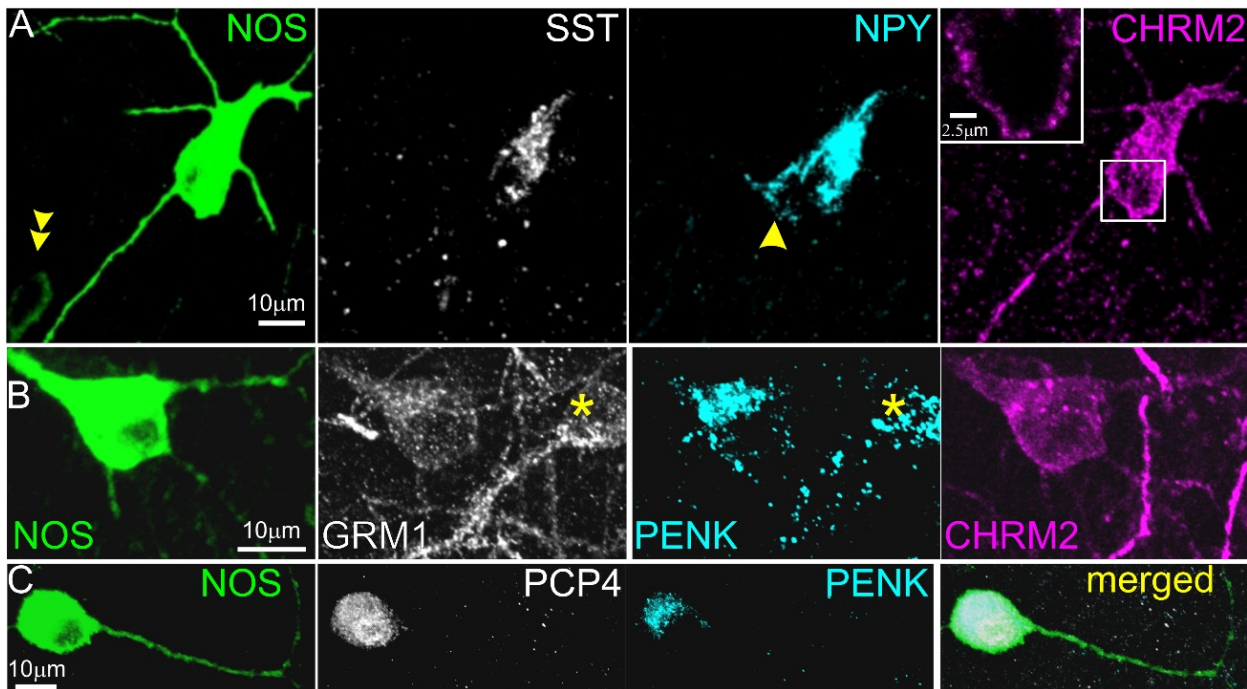

**Figure 6.** Immunohistochemical characterization of intensely NOS1-positive neurons. **A.** A large multipolar neuron in stratum pyramidale is strongly SST and NPY positive in the somatic Golgi apparatus and weakly positive for CHRM2 in the somato-dendritic plasma membrane (maximum intensity projection, z stack, height 11  $\mu\text{m}$ ; inset, maximum intensity projection of 3 optical slices, z stack height 2  $\mu\text{m}$ ). A smaller more weakly NOS1-positive cell (double arrow) in lower left is immunonegative for the other molecules; a second NPY positive cell (arrow) adjoining the NOS1+ neuron is immunonegative for the other three molecules. **B.** A NOS1-positive cell and another NOS1-immunonegative cell (asterisk) at the border of stratum radiatum and lacunosum-moleculare are both positive for GRM1 in the plasma membrane and PENK in the Golgi apparatus and in granules, but only the NOS1+ cell is immunopositive for CHRM2 (maximum intensity projection, z stack, height 10  $\mu\text{m}$ ). **C.** An intensely NOS1-positive cell in stratum radiatum is also positive for PCP4 in the cytoplasm and nucleus, and for PENK in the Golgi apparatus and in granules (maximum intensity projection, z stack, height 15  $\mu\text{m}$ ).

a quality threshold of >10,000 reads/cell, which was obtained in 11 of these neurons.

To test the hypothesis, we computed the latent factor value for each patched neuron, using the gene weights obtained from the full scRNA-seq database (Figure 4C). Confirming the hypothesis that neurons of high latent factor values have faster-spiking phenotypes, we found that latent factor values were strongly correlated with the first principal component obtained from electrophysiological measurements (Spearman rank correlation,  $r=0.79$ ;  $p=0.006$ ). Analysis of the relationship between this genetic latent factor and individual firing properties (Figure S6) confirmed that cells with high latent factor values were more likely to exhibit fast-spiking and delayed-spiking phenotypes.

### Genetic continuum partially matches that predicted from activity-regulated gene expression

Gene expression depends not only on differences between cell types, but also dynamic modulation by factors such as by activity levels (Cohen et al., 2016; Dehorter et al., 2015; Donato et al., 2013; Mardinly et al.,

2016; Spiegel et al., 2014). To test whether the continuum of gene expression revealed by our latent factor analysis was similar to that expected from activity-dependence, we correlated each gene's latent factor score with that gene's modulation by *in vivo* light exposure after dark housing, using data from 3 classes of visual cortical interneurons (made available by Mardinly et al., 2016). We observed a relatively strong positive correlation in *Sst* neurons ( $r=0.26$ ;  $p<10^{-12}$ ; Figure S7), suggesting that at least activity dependent modulation of *Sst* cells may cause them to move along this same continuum. A weaker but still significant correlation was observed for *Pvalb* neurons ( $r=0.11$ ;  $p<0.002$ ), whereas no significant relationship was found for *Vip* neurons ( $p=0.17$ ). These data therefore suggest that at least some of the continuous variability of gene expression observed in CA1 interneurons may arise from activity-dependent modulation, but that activity-dependent modulation in *Vip* cells does not match the common continuum seen in other cell types. This latter hypothesis is consistent both with the different correlation patterns seen within continent 9 of our CA1 database, and with the exceptional

patterns of activity-dependent gene modulation shown in *Vip* cells by Mardinly et al (2016).

### Histological confirmation of transcriptomic predictions

The transcriptomic classification we derived makes a large number of predictions for the combinatorial expression patterns of familiar and novel molecular markers in distinct CA1 interneuron types. To verify our transcriptomic classification, we set out to test some of these predictions using traditional methods of molecular histology.

Our first tests regarded the very distinct *Sst.Nos1* cluster. This cluster's expression pattern matched three previously reported rare hippocampal inhibitory cell types: large SST-immunopositive cells that are intensely immunoreactive for NOS1 throughout the cytoplasm revealing their full dendrites (Jinno and Kosaka, 2004 Neuroscience 124:797-808); PENK-positive projection cells (Fuentealba et al., 2008a); and strongly NADPH diaphorase-labelled (i.e. NOS1 positive) backprojection cells (Sik et al., 1994). We therefore hypothesized that these cell types, previously regarded as separate, may in fact be identical or at least closely related. To test this hypothesis, we performed a series of triple and quadruple immunoreactions, focusing on the intensely NOS1-positive neurons (n=3 mice, n=70 cells: 39% in *so/alveus*; 10% in *sp*; 27% in *sr*; 24% at *sr/slm* border). Similar to previously reported PENK-projection, backprojection, and SST/NOS1 cells (Fuentealba et al., 2008a; Jinno and Kosaka, 2004; Sik et al., 1994) – but unlike SST-positive O-LM and bistratified cells (Katona et al., 2014) – these neurons all showed aspiny or sparsely spiny dendrites. As expected from the *Sst.Nos1* cluster, we found that they were all SST/NPY double positive (n=20/20) and were virtually all weakly positive for CHRM2 (n=36/38) and GRM1 (n=17/17) in the somato-dendritic plasma membrane, strongly positive for PCP4 (n=19/21) in the cytoplasm and nucleus, and for PENK (n=35/42) in the Golgi apparatus and granules in the soma and proximal dendrites (Figure 6). By contrast, the more numerous moderately NOS1 positive cells (which include many interneuron types such as ivy, MGE-neurogliaform and a subset of IS-3 neurons) were mostly immunonegative for CHRM2, PCP4 and PENK, although some were positive for GRM1. Our results are therefore consistent with the hypothesis that all three previously reported classes correspond to the *Sst1.Nos1* cluster.

A second prediction of our classification was the expression of *Npy* in multiple subclasses of *Cck* cell, most notably the *Slc17a8* and *Calb1* expressing clusters of continent 8. This was unexpected, as NPY (at least at the

protein level) has instead been traditionally associated with SST-expressing neurons and ivy/neurogliaform cells (Fuentealba et al., 2008a, Katona et al., 2014). Nevertheless, no studies to our knowledge have yet examined immunohistochemically whether the neuropeptides NPY and CCK can be colocalised in the same interneurons. We therefore tested this by double immunohistochemistry in *sr* and *slm* (Figure S8A,B, n=3 mice). Consistent with our predictions, 119 out of 162 (74±6%) of the cells immunopositive for pro-CCK were also positive for NPY (an additional 73 cells were positive for NPY only, which according to our identifications should represent neurogliaform and radiatum-retrohippocampal cells). A subset (176 cells) of NPY and/or pro-CCK immunopositive neurons were further tested for CALB1 in triple immunoreactions. As expected, nearly all CALB1-positive neurons were pro-CCK-positive (89±2%), and CALB1 immunoreactivity was seen in a subset of the cells containing both pro-CCK and NPY (27±3%). Additional triple immunohistochemistry for NPY, pro-CCK and SLC17A8 (VGLUT3) revealed triple positive cells in *sr* and particularly at the *sr/slm* border (Figure S8B). Due to the low level of somatic immunoreactivity for SLC17A8 (which as a vesicular transporter is primarily trafficked to axon terminals), we could not count these cells reliably; however of the cells that were unambiguously immunopositive for SLC17A8, in a majority we detected NPY. Additional analysis combining double *in situ* hybridization for *Slc17a8* and *Npy* with immunohistochemistry for pro-CCK (Figure S8B, n=3 mice) confirmed that the great majority of *Slc17a8*-expressing cells were also positive for *Npy* and pro-CCK (84±3%). As predicted by our identifications, the converse was not true: a substantial population of *Npy*/pro-CCK double-positive cells (57±7% of the total) did not show detectable *Slc17a8*, which we identify with dendrite-targeting neurons in the east of continent 8.

Several cell types in our classification expressed *Cxcl14*, a gene whose expression pattern in the Allen Atlas shows localization largely at the *sr/slm* border. The *Cxcl14*-positive population includes all clusters of continent 8, which express *Cck* and contain subclusters expressing *Npy*, *Calb1*, *Reln*, and *Vip*; a subtype of CGE-derived neurogliaform cell that expresses *Reln* and *Npy* but lacks *Nos1* and expresses *Kit* at most weakly; as well as IS-1, IS-2, and radiatum-retrohippocampal cells. However, our classification predicts that the *Cxcl14*-positive population should be distinct from all MGE-derived neurons, including MGE-derived neurogliaform cells.

To test these predictions, we performed *in situ* hybridization for *Cxcl14* simultaneously with *in situ* hybridization or immunohistochemistry to detect *Reln*,



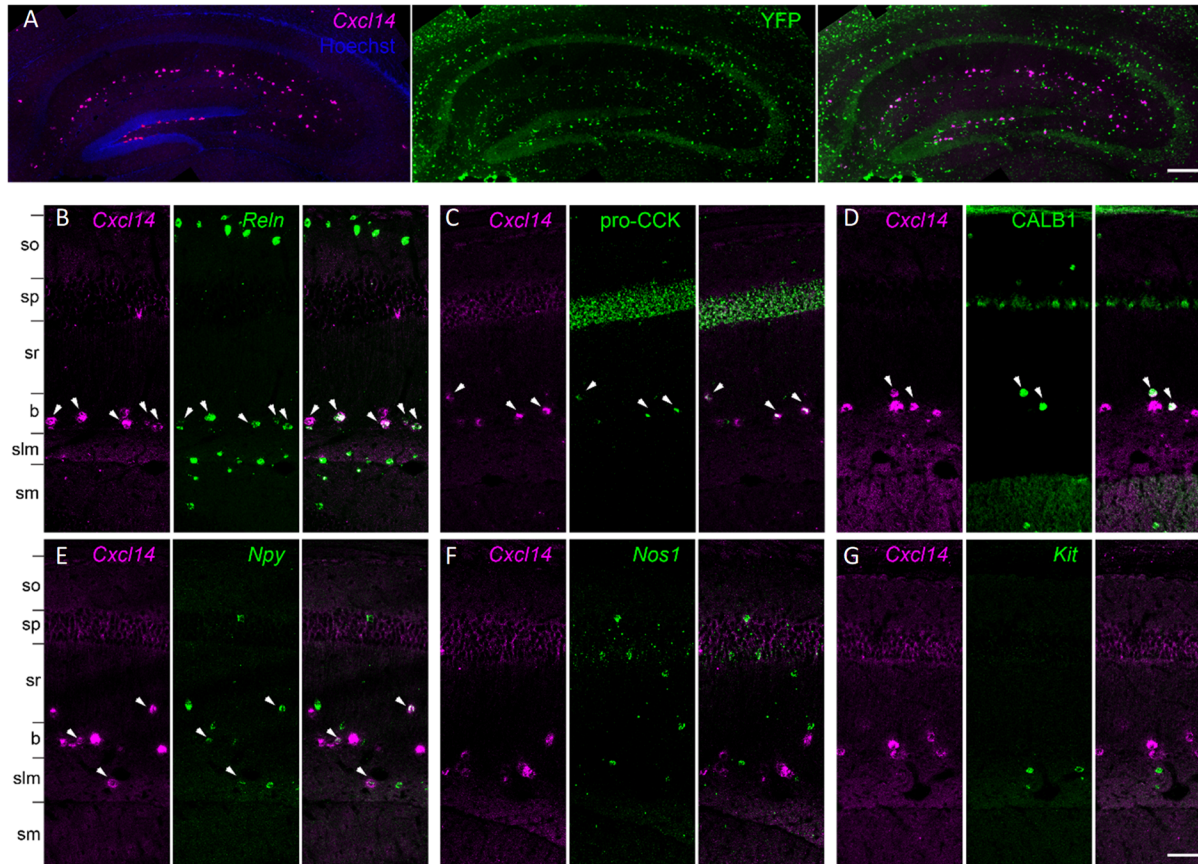

**Figure 7.** Analysis of *Cxcl14* co-expression patterns confirms predicted properties *Cck.Cxcl14* cells. **A**, *Cxcl14*-expressing cells are CGE-derived: in situ hybridization for *Cxcl14* combined with immunohistochemistry for YFP in the *Lhx6-Cre/R26R-YFP* mouse yields no double labelling. **B**, Double in situ hybridization for *Cxcl14* and *Reln* marks a population of neurons located primarily at the *sr/slm* border. Note *Reln* expression without *Cxcl14* in *so* and *slm*, likely reflecting O-LM and neurogliaform cells. **C-E**, Subsets of the *Cxcl14*-positive neurons are positive for pro-CCK or CALB1 (in situ hybridization plus immunohistochemistry), or *Npy* (double in situ hybridization). **(f, g)** No overlap was seen of *Cxcl14* with *Nos1* or *Kit*. In all panels, arrowheads indicate double-expressing neurons. Layer abbreviations: *so*, stratum oriens; *sp*, stratum pyramidale; *sr*, stratum radiatum; *b*, *sr/slm* border region; *slm*, stratum lacunosum-moleculare; *sm*, stratum moleculare of the dentate gyrus. Scale bars: 200  $\mu$ m (a), 100  $\mu$ m (b-g).

*Npy*, CALB1, CCK, PVALB, *Sst*, *Nos1* and *Kit* (n=3 mice; **Figure 7**). In addition, we combined fluorescent in situ hybridization for *Cxcl14* with immunohistochemistry for YFP in *Lhx6-Cre/R26R-YFP* mice, which allows identification of developmental origin by marking MGE-derived interneurons (Fogarty et al., 2007). The results of these experiments were consistent with our hypotheses. We found that within CA1, *Cxcl14*-expressing cells were primarily located at the R-LM border (71 $\pm$ 3%), although a subpopulation of cells were also found other layers. We found no overlap of *Cxcl14* with YFP in the *Lhx6-Cre/R26R-YFP* mouse, confirming the CGE origin of *Cxcl14* expressing neurons (**Figure 7A**); consistent with this finding, no overlap was seen with *Cxcl14* and *Sst* or *Pvalb* (data not shown). The majority of *Cxcl14*-positive cells expressed *Reln* (72 $\pm$ 4%), accounting for 42 $\pm$ 9% of *Reln*-expressing neurons (Substantial populations of *Reln+/Cxcl14-* cells were located in strata oriens and

lacunosum-moleculare and likely represent O-LM and MGE-neurogliaform cells, respectively (**Figure 7B**). Indeed, although less than half of *Reln* cells were located at the R-LM border (44 $\pm$ 1%), the great majority of *Reln+/Cxcl14+* cells were found there (88 $\pm$ 6%). Consistent with the expected properties of continent 8 cells, a large fraction of the *Cxcl14* population were immunoreactive for pro-CCK (62 $\pm$ 6%; **Figure 7C**), while substantial minorities were positive for CALB1 (29 $\pm$ 2%; **Figure 7D**) or *Npy* (25 $\pm$ 5%; **Figure 7E**). However, as expected from the lack of *Cxcl14* in MGE-derived neurogliaform and IS-3 cells, we observed no overlap of *Cxcl14* with *Nos1* (0 out of 209 cells; **Figure 7F**); and very weak overlap with *Kit*, which is primarily expressed in the *Cxcl14*-negative CGE-neurogliaform population (1 of 264 cells respectively, from all mice; **Figure 7G**).

The cluster *Cck.Cxcl14.Vip* presented a puzzle, since *Cxcl14* is located primarily at the *sr/slm* border, whereas

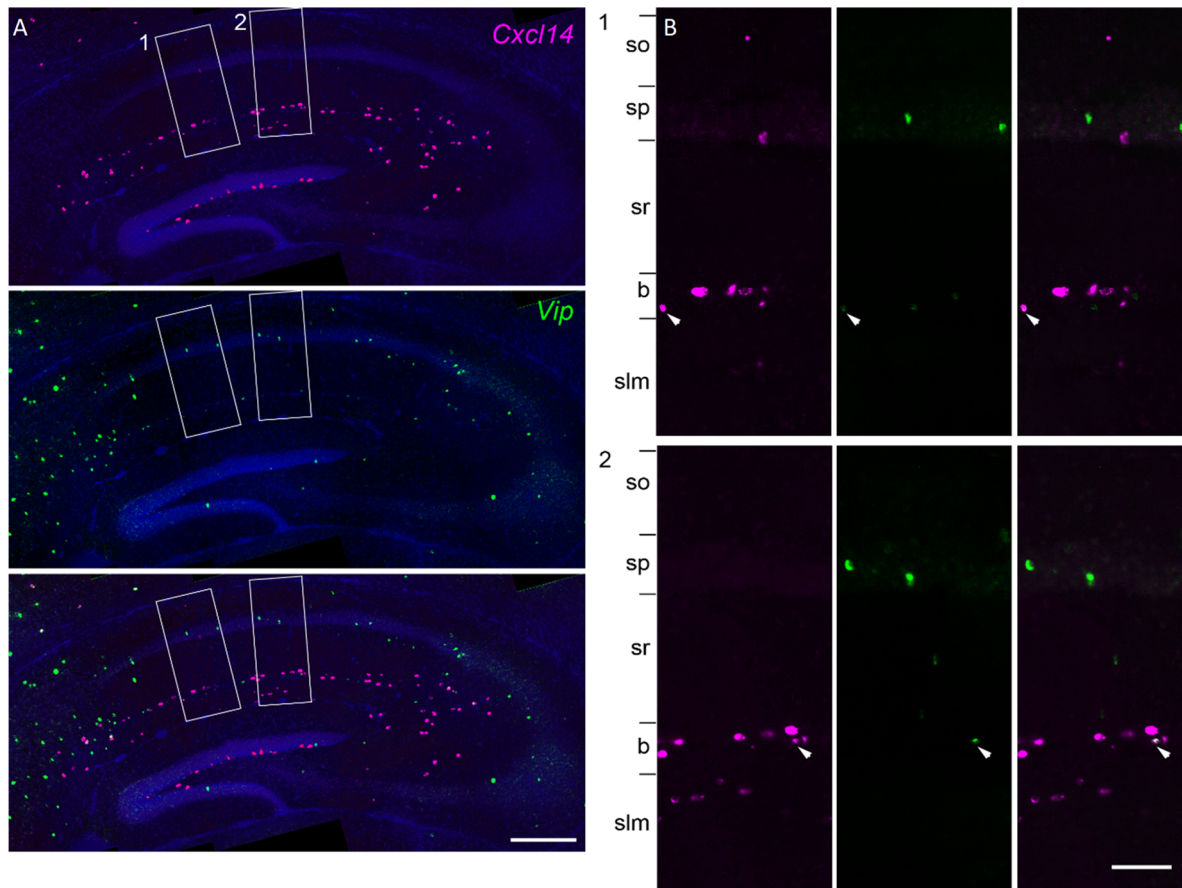

**Figure 8.** Overlap of *Cxcl14* and *Vip*. Although *Cxcl14* is detected primarily at the *sr/slm* border, cells can rarely be detected in other layers such as *sp*. Nevertheless, the vast majority of cells co-expressing *Cxcl14* and *Vip* were found at the *sr/slm* border. **A**, double fluorescent *in situ* hybridization images; right; **B**, zoom into rectangles 1 and 2. Arrowheads: double-expressing cells.

immunohistochemistry in rat has localized CCK/VIP basket cells to *sp* (Acsady et al., 1996). Because *Cxcl14* expression can sometimes also be found in *sp*, we tested whether this cluster reflects *sp* cells, by combining *in situ* hybridization for *Cxcl14* with immunohistochemistry against VIP in mouse CA1 (**Figure 8**). This revealed frequent co-expression at the *sr/slm* border ( $8 \pm 1\%$  *Cxcl14* cells positive for *Vip*;  $23 \pm 1\%$  *Vip* cells positive for *Cxcl14*), but very few *Cxcl14* cells in *sp*, and essentially no double labelling (1 of 147 *Vip* cells in *sp* was weakly labelled for *Cxcl14*). We therefore conclude that this cluster indeed represents a novel cell type located at the *sr/slm* border, expressing *Cck*, *Vip*, and *Cxcl14*.

## Discussion

The molecular architecture of CA1 interneurons has been intensively studied over the last decades, leading to the identification of 23 inhibitory classes. Our transcriptomic data showed a remarkable correspondence to this previous work, with all previously-described classes

identified in our database. Our analysis also revealed a continuous mode of variability common across multiple cell types, so hypothesized novel classes, as well as additional molecular subdivisions of previously described cell types.

Our results suggest that three of the previous described CA1 cell classes may in fact represent a single cell type. The *Sst.Nos1* class is strongly positive for *Nos1*, and also expresses *Sst*, *Npy*, *Chrm2*, *Pcp4* and *Penk*, but unlike *Penk*-positive interneuron-selective cells of continent 9 lacks *Vip*. This class is homologous to the *Int1* and *Sst Chodl* classes defined in isocortex, which have been identified with long-range projecting sleep-active neurons (Gerashchenko et al., 2008; Magno et al., 2012; Tasic et al., 2016; Zeisel et al., 2015). Because previous studies tested different subsets of these molecules, the equivalence of these types may have been overlooked. For example, the PENK-immunopositive neurons with projections to subiculum reported in rat were shown to be VIP-negative, but not tested for SST or NOS1 (Fumentalba et



al., 2008b); the NADPH diaphorase-labelled (i.e. strongly NOS1 positive) axons reported by Sik et al (1994) as projecting to CA3 and dentate were not labelled for SST or PENK; and the SST/NOS1 cells identified by Jinno and Kosaka (2004) in mouse were not tested for long-range projections or for PENK. While it remains possible that a larger transcriptomic sample of these rare neurons would reveal subclasses, our present data suggest that *Sst.Nos1* cells are a homogeneous population. We therefore suggest that they constitute a population of inhibitory neurons with diverse long-range projection targets. Interestingly, the targets of PENK-positive projection cells are most commonly PVALB-positive interneurons, unlike conventional IS cells, which preferentially target SST cells (Fuentelba et al., 2008a). If these do indeed correspond to sleep-active neurons, this fact may provide an important clue to the mechanisms underlying sleep in cortical circuits.

The match between our transcriptomic analysis and previous immunohistochemical work (primarily in rat) is so close that it is simpler to describe the few areas of disagreement than the many areas of agreement. First, ACTN2 has been used as a neurogliaform marker in rat (Price et al., 2005), but was almost completely absent from any cell type of our database. We suggest this reflects a species difference, as previous attempts with multiple ACTN2 antibodies have been unsuccessful in mouse (JH-L, unpublished observations), and *Actn2* labelling is not detectable in the Allen atlas (Lein et al., 2007). A second inconsistency regards NCALD, which in rat was reported not to overlap with PVALB, SST, or NPY (Martínez-Guijarro et al., 1998), but did so in our data. Finally, it has previously been reported that a subset of O-LM cells show *Htr3a* expression (Chittajallu et al., 2013). In our data, we observed at most weak expression of *Htr3a* in *Sst* cells, and the cells showing it belonged to clusters identified as hippocamposeptal rather than O-LM cells.

Our analysis revealed several rare and presumably novel cell groups, although we cannot exclude that some of these were inadvertently included from areas bordering CA1. *Sst.Npy.Serpine2* and *Sst.Npy.Mgat4c*, which simultaneously expressed *Sst*, *Npy*, and *Reln* fit the expected expression pattern of neither O-LM nor hippocamposeptal cells; *Sst.Erbb4.Rgs10* is a distinct group related to *Pvalb* basket and bistratified cells; *Cck.Lypd1* formed a rare and highly distinct class expressing *Cck*, *Slc17a8*, and *Calb1* that may be localized near the CA3 border; *Ntng1.Synpr* showed an expression pattern with features of both *sr/slm* *Cck* neurons and projection cells; and *Cck.Cxcl14.Vip* represents a cell class strongly positive for both *Cck* and *Vip* located at the *sr/slm* border that appears to represent a pyramidal- rather than

interneuron-targeting class. The analysis also revealed subdivisions of known types, such as the division of IS-3 cells into *Nos1* positive and negative groups, and the division of CGE-NGF cells into *Car4*- and *Cxcl14*-expressing subtypes. Finally, our data suggested that with further data, even rarer types are likely to be found, such as a small group of cells with features of both basket and axo-axonic cells located off the coast of continent 3. Indeed, such cells have been encountered by quantitative electron microscopic analysis of synaptic targets in the rat (P. S., unpublished observations).

Latent factor analysis revealed a common continuum of gene expression across the database, with differences both between clusters, and within the cells of a single cluster. Many of the genes positively correlated with the latent factor are associated with fast-spiking phenotype, and this relationship was confirmed using patch-seq in *Pvalb* interneurons. Several other classes of genes were correlated with the latent factor including genes related to presynaptic function, GABA release, metabolism, or excitatory and inhibitory inputs (including GABA<sub>B</sub>). Clusters with high mean values of the factor were identified with interneuron types targeting pyramidal cell somas or proximal dendrites (such as *Pvalb* or *Cck/Slc17a8* expressing basket cells), while those with low mean values were identified with interneurons targeting pyramidal distal dendrites (such as *Sst* or *Cck/Calb1* expressing dendrite-targeting cells) or other interneurons. This correlation makes functional sense: because distal dendritic inputs will be subject to passive dendritic filtering, their vesicle release does not need to be so accurately timed, as reflected in lower expression of fast-timing genes such as *Kcnc1* (Hu et al., 2014). I-S cells had the lowest mean values of the latent factor, consistent with their small axonal trees and metabolic machinery (Gulyás et al., 2006). The stronger expression of most neuropeptides in cells of low latent factor suggests that these slower, distal-targeting interneurons may also rely more heavily on neuropeptide signaling, for which slow firing rates support outputs transduced by slower G-protein coupled receptors.

The precise genes modulated by the latent factor varied between cell classes. For example, while *Pvalb* and *Cnr1* both correlated positively with the factor, they were expressed in different sets of neurons. The latent factor analysis suggested several genes as interesting candidates for future research, such as *Trp53i11*, *Yjefn3* and *Rgs10*, associated with faster spiking *Cck* cells; *Zcchc12* and *6330403K07Rik*, both associated with slower-firing cells of all classes; and *Fxyd6*, associated with slow-spiking that may modulate ion exchange. Intriguingly, we found that genes for neurofilaments and other

intermediate filaments were positively correlated with the latent factor, while genes involved in actin processing were negatively correlated; we speculate that this might reflect a different cytoskeletal organization required for somatic- and dendritic-targeting neurons.

In addition to differences in mean latent factor values between cell types, we also observed continuous gradation within cell types, along the same continuum. This may at least partially reflect activity-dependent modulation of gene expression. Indeed, analysis of the data of Mardinly et al (2016) showed that genes positively related to the latent factor were also more likely to be upregulated by light exposure in visual cortical interneurons. We therefore hypothesize that the latent factor represents a program of gene expression that differs between cell types (presumably due to early developmental factors), but can also be fine-tuned by activity dependence in adulthood, with higher levels of network activity leading to a homeostatic increase in expression of factor-related genes such as those relating to GABA release and interneuron metabolism. Interestingly, the pattern of continuous variation within continent 9 was different to other classes, perhaps indicating a different role for activity-dependent homeostasis in interneuron-selective cells.

The relatively simple cytoarchitecture of CA1 compared to other cortical regions suggests that the organization revealed by these data represent a “lower bound” on the level of complexity to that can exist in cortical circuits. For example, it is likely that isocortex has considerably more complex cell-type organization due to its lamination and arealization. An understanding of the multifarious classes of such cells is an essential step toward deciphering their function.

## Author Contributions

KDH initiated collaboration (with JH-L), devised and implemented transcriptomic data analyses (Figs. 1-5, S1-S7), identified cell classes, wrote manuscript.

CBG bred animals, performed Patch-Seq experiments, and analyzed data (Fig. 5).

HG and NGS optimized protocols for adult mice and performed single cell sequencing.

LM performed FISH and IHC experiments and cell counts (Figs. 7,8 and S8C).

LK performed IHC experiments and cell counts (Figs. 6, S8A,B).

PS performed IHC experiments and cell counts (Figs. 6, S8A,B) contributed to cell class identification and manuscript writing.

NK supervised FIH and IHC experiments (Figs. 7,8 and S8C).

SL supervised single-cell sequencing.

JH-L initiated collaboration (with KDH), supervised single-cell and Patch-Seq experiments and analysis, contributed to manuscript writing.

## Acknowledgements

We thank T. Viney, A. Joshi, G. Unal, and B. Bekkouche for discussions and comments on the manuscript. This work was supported by the Wellcome Trust (108726 to KDH, NK, PS, SL, and JH-L), Medical Research Council (PS) European Research Council (261063 to SL), Swedish Research Council (STARGET to SL, and 2014-3863 to JH-L), StratNeuro (JH-L), Knut and Alice Wallenberg Foundation (SL) and European Union FP7/Marie Curie Actions (322304 to JH-L).

REFERENCES

- Acsady, L., Arabadzisz, D., and Freund, T.F. (1996). Correlated morphological and neurochemical features identify different subsets of vasoactive intestinal polypeptide-immunoreactive interneurons in rat hippocampus. *Neuroscience* 73, 299–315.
- Acsády, L., Pascual, M., Rocamora, N., Soriano, E., and Freund, T.F. (2000). Nerve growth factor but not neurotrophin-3 is synthesized by hippocampal GABAergic neurons that project to the medial septum. *Neuroscience* 98, 23–31.
- Blasco-Ibanez, J.M., Martinez-Guijarro, F.J., and Freund, T.F. (1998). Enkephalin-containing interneurons are specialized to innervate other interneurons in the hippocampal CA1 region of the rat and guinea-pig. *Eur J Neurosci* 10, 1784–1795.
- Bouveyron, C., and Brunet-Saumard, C. (2014). Model-based clustering of high-dimensional data: A review. *Comput. Stat. Data Anal.* 71, 52–78.
- Cadwell, C.R., Palasantza, A., Jiang, X., Berens, P., Deng, Q., Yilmaz, M., Reimer, J., Shen, S., Bethge, M., Tolias, K.F., et al. (2016). Electrophysiological, transcriptomic and morphologic profiling of single neurons using Patch-seq. *Nat. Biotechnol.* 34, 199–203.
- Chittajallu, R., Craig, M.T., McFarland, A., Yuan, X., Gerfen, S., Tricoire, L., Erkkila, B., Barron, S.C., Lopez, C.M., Liang, B.J., et al. (2013). Dual origins of functionally distinct O-LM interneurons revealed by differential 5-HT(3A)R expression. *Nat Neurosci* 16, 1598–1607.
- Cho, J., Yu, N.-K., Choi, J.-H., Sim, S.-E., Kang, S.J., Kwak, C., Lee, S.-W., Kim, J., Choi, D.I., Kim, V.N., et al. (2015). Multiple repressive mechanisms in the hippocampus during memory formation. *Science* 350, 82–87.
- Choudhury, K., McQuillin, A., Puri, V., Pimm, J., Datta, S., Thirumalai, S., Krasucki, R., Lawrence, J., Bass, N.J., Queded, D., et al. (2007). A genetic association study of chromosome 11q22–24 in two different samples implicates the FXD6 gene, encoding phosphohippolin, in susceptibility to schizophrenia. *Am. J. Hum. Genet.* 80, 664–672.
- Cohen, S.M., Ma, H., Kuchibhotla, K.V., Watson, B.O., Buzsáki, G., Froemke, R.C., and Tsien, R.W. (2016). Excitation-Transcription Coupling in Parvalbumin-Positive Interneurons Employs a Novel CaM Kinase-Dependent Pathway Distinct from Excitatory Neurons. *Neuron* 90, 292–307.
- Cope, D.W., Maccaferri, G., Marton, L.F., Roberts, J.D., Cobden, P.M., and Somogyi, P. (2002). Cholecystokinin-immunopositive basket and Schaffer collateral-associated interneurons target different domains of pyramidal cells in the CA1 area of the rat hippocampus. *Neuroscience* 109, 63–80.
- Dehorter, N., Ciceri, G., Bartolini, G., Lim, L., del Pino, I., and Marin, O. (2015). Tuning of fast-spiking interneuron properties by an activity-dependent transcriptional switch. *Science* 349, 1216–1220.
- Donato, F., Rompani, S.B., and Caroni, P. (2013). Parvalbumin-expressing basket-cell network plasticity induced by experience regulates adult learning. *Nature* 504, 272–276.
- Dudok, B., Barna, L., Ledri, M., Szabó, S.I., Szabadits, E., Pintér, B., Woodhams, S.G., Henstridge, C.M., Balla, G.Y., Nyilas, R., et al. (2015). Cell-specific STORM super-resolution imaging reveals nanoscale organization of cannabinoid signaling. *Nat. Neurosci.* 18, 75–86.
- Freund, T.F., and Buzsáki, G. (1996). Interneurons of the hippocampus. *Hippocampus* 6, 347–470.
- Fuentealba, P., Tomioka, R., Dalezios, Y., Marton, L.F., Studer, M., Rockland, K., Klausberger, T., and Somogyi, P. (2008a). Rhythmically active enkephalin-expressing GABAergic cells in the CA1 area of the hippocampus project to the subiculum and preferentially innervate interneurons. *J Neurosci* 28, 10017–10022.
- Fuentealba, P., Begum, R., Capogna, M., Jinno, S., Marton, L.F., Csicsvari, J., Thomson, A., Somogyi, P., and Klausberger, T. (2008b). Ivy cells: a population of nitric-oxide-producing, slow-spiking GABAergic neurons and their involvement in hippocampal network activity. *Neuron* 57, 917–929.
- Fuzik, J., Zeisel, A., Máté, Z., Calvigioni, D., Yanagawa, Y., Szabó, G., Linnarsson, S., and Harkany, T. (2016). Integration of electrophysiological recordings with single-cell RNA-seq data identifies neuronal subtypes. *Nat. Biotechnol.* 34, 175–183.
- Gerashchenko, D., Wisor, J.P., Burns, D., Reh, R.K., Shiromani, P.J., Sakurai, T., de la Iglesia, H.O., and Kilduff, T.S. (2008). Identification of a population of sleep-active cerebral cortex neurons. *Proc. Natl. Acad. Sci. U. S. A.* 105, 10227–10232.
- Gulyás, A.I., and Freund, T.F. (1996). Pyramidal cell dendrites are the primary targets of calbindin D28k-immunoreactive interneurons in the hippocampus. *Hippocampus* 6, 525–534.
- Gulyás, A.I., Hájos, N., and Freund, T.F. (1996). Interneurons containing calretinin are specialized to control other interneurons in the rat hippocampus. *J. Neurosci. Off. J. Soc. Neurosci.* 16, 3397–3411.
- Gulyás, A.I., Buzsáki, G., Freund, T.F., and Hirase, H. (2006). Populations of hippocampal inhibitory neurons express different levels of cytochrome c. *Eur. J. Neurosci.* 23, 2581–2594.
- Habib, N., Li, Y., Heidenreich, M., Swiech, L., Avraham-David, I., Trombetta, J.J., Hession, C., Zhang, F., and Regev, A. (2016). Div-Seq: Single-nucleus RNA-Seq reveals dynamics of rare adult newborn neurons. *Science* 353, 925–928.
- Hu, H., Gan, J., and Jonas, P. (2014). Interneurons. Fast-spiking, parvalbumin<sup>+</sup> GABAergic interneurons: from cellular design to microcircuit function. *Science* 345, 1255263.
- Jinno, S., and Kosaka, T. (2004). Patterns of colocalization of neuronal nitric oxide synthase and somatostatin-like immunoreactivity in the mouse hippocampus: quantitative analysis with optical disector. *Neuroscience* 124, 797–808.
- Jinno, S., Klausberger, T., Marton, L.F., Dalezios, Y., Roberts, J.D., Fuentealba, P., Bushong, E.A., Henze, D., Buzsáki, G., and Somogyi, P. (2007). Neuronal diversity in GABAergic long-range projections from the hippocampus. *J Neurosci* 27, 8790–8804.
- Katona, L., Lapray, D., Viney, T.J., Oulhaj, A., Borhegyi, Z., Micklem, B.R., Klausberger, T., and Somogyi, P. (2014). Sleep and movement differentiates actions of two types of somatostatin-expressing GABAergic interneuron in rat hippocampus. *Neuron* 82, 872–886.

- Klausberger, T., and Somogyi, P. (2008). Neuronal diversity and temporal dynamics: the unity of hippocampal circuit operations. *Science* 321, 53–57.
- Klausberger, T., Marton, L.F., O'Neill, J., Huck, J.H., Dalezios, Y., Fuentealba, P., Suen, W.Y., Papp, E., Kaneko, T., Watanabe, M., et al. (2005). Complementary roles of cholecystokinin- and parvalbumin-expressing GABAergic neurons in hippocampal network oscillations. *J Neurosci* 25, 9782–9793.
- Lee, S.-H., Földy, C., and Soltesz, I. (2010). Distinct endocannabinoid control of GABA release at perisomatic and dendritic synapses in the hippocampus. *J. Neurosci. Off. J. Soc. Neurosci.* 30, 7993–8000.
- Lein, E.S., Hawrylycz, M.J., Ao, N., Ayres, M., Bensinger, A., Bernard, A., Boe, A.F., Boguski, M.S., Brockway, K.S., Byrnes, E.J., et al. (2007). Genome-wide atlas of gene expression in the adult mouse brain. *Nature* 445, 168–176.
- Losonczy, A., Zhang, L., Shigemoto, R., Somogyi, P., and Nusser, Z. (2002). Cell type dependence and variability in the short-term plasticity of EPSCs in identified mouse hippocampal interneurons. *J. Physiol.* 542, 193–210.
- Lu, J., Tomfohr, J.K., and Kepler, T.B. (2005). Identifying differential expression in multiple SAGE libraries: an overdispersed log-linear model approach. *BMC Bioinformatics* 6, 165.
- Maaten, L. van der, and Hinton, G. (2008). Visualizing Data using t-SNE. *J. Mach. Learn. Res.* 9, 2579–2605.
- Macosko, E.Z., Basu, A., Satija, R., Nemesh, J., Shekhar, K., Goldman, M., Tirosh, I., Bialas, A.R., Kamitaki, N., Martersteck, E.M., et al. (2015). Highly Parallel Genome-wide Expression Profiling of Individual Cells Using Nanoliter Droplets. *Cell* 161, 1202–1214.
- Magno, L., Oliveira, M.G., Mucha, M., Rubin, A.N., and Kessaris, N. (2012). Multiple embryonic origins of nitric oxide synthase-expressing GABAergic neurons of the neocortex. *Front Neural Circuits* 6, 65.
- Mardinly, A.R., Spiegel, I., Patrizi, A., Centofante, E., Bazinet, J.E., Tzeng, C.P., Mandel-Brehm, C., Harmin, D.A., Adesnik, H., Fagiolini, M., et al. (2016). Sensory experience regulates cortical inhibition by inducing IGF1 in VIP neurons. *Nature* 531, 371–375.
- Marques, S., Zeisel, A., Codeluppi, S., van Bruggen, D., Mendanha Falcão, A., Xiao, L., Li, H., Häring, M., Hochgerner, H., Romanov, R.A., et al. (2016). Oligodendrocyte heterogeneity in the mouse juvenile and adult central nervous system. *Science* 352, 1326–1329.
- Martínez-Guijarro, F.J., Briñón, J.G., Blasco-Ibáñez, J.M., Okazaki, K., Hidaka, H., and Alonso, J.R. (1998). Neurocalcin-immunoreactive cells in the rat hippocampus are GABAergic interneurons. *Hippocampus* 8, 2–23.
- Miyashita, T., and Rockland, K.S. (2007). GABAergic projections from the hippocampus to the retrosplenial cortex in the rat. *Eur J Neurosci* 26, 1193–1204.
- Pawelzik, H., Hughes, D.I., and Thomson, A.M. (2002). Physiological and morphological diversity of immunocytochemically defined parvalbumin- and cholecystokinin-positive interneurons in CA1 of the adult rat hippocampus. *J. Comp. Neurol.* 443, 346–367.
- Price, C.J., Cauli, B., Kovacs, E.R., Kulik, A., Lambolez, B., Shigemoto, R., and Capogna, M. (2005). Neurogliaform neurons form a novel inhibitory network in the hippocampal CA1 area. *J. Neurosci. Off. J. Soc. Neurosci.* 25, 6775–6786.
- Robinson, M.D., and Smyth, G.K. (2008). Small-sample estimation of negative binomial dispersion, with applications to SAGE data. *Biostatistics* 9, 321–332.
- Schwarz, G. (1978). Estimating the Dimension of a Model. *Ann. Stat.* 6, 461–464.
- Sik, A., Ylinen, A., Penttonen, M., and Buzsáki, G. (1994). Inhibitory CA1-CA3-hilar region feedback in the hippocampus. *Science* 265, 1722–1724.
- Somogyi, P. (2010). Hippocampus: intrinsic organization. In *Handbook of Brain Microcircuits*, G.M. Shepherd, and S. Grillner, eds. (New York: Oxford University Press), p.
- Somogyi, J., Baude, A., Omori, Y., Shimizu, H., El Mestikawy, S., Fukaya, M., Shigemoto, R., Watanabe, M., and Somogyi, P. (2004). GABAergic basket cells expressing cholecystokinin contain vesicular glutamate transporter type 3 (VGLUT3) in their synaptic terminals in hippocampus and isocortex of the rat. *Eur J Neurosci* 19, 552–569.
- Spiegel, I., Mardinly, A.R., Gabel, H.W., Bazinet, J.E., Couch, C.H., Tzeng, C.P., Harmin, D.A., and Greenberg, M.E. (2014). Npas4 regulates excitatory-inhibitory balance within neural circuits through cell-type-specific gene programs. *Cell* 157, 1216–1229.
- Tasic, B., Menon, V., Nguyen, T.N., Kim, T.K., Jarsky, T., Yao, Z., Levi, B., Gray, L.T., Sorensen, S.A., Dolbeare, T., et al. (2016). Adult mouse cortical cell taxonomy revealed by single cell transcriptomics. *Nat. Neurosci.* 19, 335–346.
- Tricoire, L., Pelkey, K.A., Daw, M.I., Sousa, V.H., Miyoshi, G., Jeffries, B., Cauli, B., Fishell, G., and McBain, C.J. (2010). Common origins of hippocampal Ivy and nitric oxide synthase expressing neurogliaform cells. *J Neurosci* 30, 2165–2176.
- Tricoire, L., Pelkey, K.A., Erkkila, B.E., Jeffries, B.W., Yuan, X., and McBain, C.J. (2011). A blueprint for the spatiotemporal origins of mouse hippocampal interneuron diversity. *J Neurosci* 31, 10948–10970.
- Tyan, L., Chamberland, S., Magnin, E., Camire, O., Francavilla, R., David, L.S., Deisseroth, K., and Topolnik, L. (2014). Dendritic inhibition provided by interneuron-specific cells controls the firing rate and timing of the hippocampal feedback inhibitory circuitry. *J Neurosci* 34, 4534–4547.
- Usoskin, D., Furlan, A., Islam, S., Abdo, H., Lonnerberg, P., Lou, D., Hjerling-Leffler, J., Haeggstrom, J., Kharchenko, O., Kharchenko, P.V., et al. (2015). Unbiased classification of sensory neuron types by large-scale single-cell RNA sequencing. *Nat Neurosci* 18, 145–153.
- Viney, T.J., Lasztocki, B., Katona, L., Crump, M.G., Tucker, J.J., Klausberger, T., and Somogyi, P. (2013). Network state-dependent inhibition of identified hippocampal CA3 axo-axonic cells in vivo. *Nat. Neurosci.* 16, 1802–1811.
- Vruwink, M., Schmidt, H.H., Weinberg, R.J., and Burette, A. (2001). Substance P and nitric oxide signaling in cerebral cortex: anatomical evidence for reciprocal signaling between two classes of interneurons. *J. Comp. Neurol.* 441, 288–301.
- Zeisel, A., Munoz-Manchado, A.B., Codeluppi, S., Lonnerberg, P., La Manno, G., Jureus, A., Marques, S., Munguba, H., He,



## CA1 inhibitory neurons

L., Betsholtz, C., et al. (2015). Brain structure. Cell types in the mouse cortex and hippocampus revealed by single-cell RNA-seq. *Science* 347, 1138–1142.
